## 1 An enzyme-based immunodetection assay to quantify SARS-CoV-2 infection

2  
3 Carina Conzelmann<sup>a</sup>, Andrea Gilg<sup>a</sup>, Rüdiger Groß<sup>a</sup>, Desirée Schütz<sup>a</sup>, Nico Preisning<sup>b</sup>, Ludger Ständker<sup>b</sup>,  
4 Bernd Jahrsdörfer<sup>c,d</sup>, Hubert Schrezenmeier<sup>c,d</sup>, Konstantin M. J. Sparrer<sup>a</sup>, Thomas Stamminger<sup>e</sup>, Steffen  
5 Stenger<sup>f</sup>, Jan Münch<sup>a,b</sup>, Janis A. Müller<sup>a,#</sup>

6  
7 <sup>a</sup> Institute of Molecular Virology, Ulm University Medical Center, 89081 Ulm, Germany

8 <sup>b</sup> Core Facility Functional Peptidomics, Ulm University Medical Center, 89081 Ulm, Germany

9 <sup>c</sup> Institute for Transfusion Medicine, Ulm University, 89081 Ulm, Germany.

10 <sup>d</sup> Institute for Clinical Transfusion Medicine and Immunogenetics Ulm, German Red Cross Blood  
11 Services Baden-Württemberg-Hessen and University Hospital Ulm, 89081 Ulm, Germany

12 <sup>e</sup> Institute of Virology, Ulm University Medical Center, 89081 Ulm, Germany

13 <sup>f</sup> Institute of Medical Microbiology and Hygiene, Ulm University Medical Center, 89081 Ulm, Germany

14  
15  
16  
17 # Correspondence: Janis A. Müller ([Janis.mueller@uni-ulm.de](mailto:Janis.mueller@uni-ulm.de))

18  
19 **Key words:** SARS-CoV-2; in-cell ELISA; antiviral testing; neutralization; drug screening

### 20 21 **Highlights:**

- 22 • Determination of SARS-CoV-2 infection by enzymatically quantifying the expression of viral  
23 spike protein in bulk cell cultures
- 24 • Targeting a highly conserved region in the S2 subunit of the S protein allows broad detection of  
25 several SARS-CoV-2 isolates in different cell lines
- 26 • Screening of antivirals in microtiter format and determining the antiviral activity as inhibitory  
27 concentrations 50 (IC<sub>50</sub>)

### 28 29 **Abstract:**

30 SARS-CoV-2 is a novel pandemic coronavirus that caused a global health and economic crisis. The  
31 development of efficient drugs and vaccines against COVID-19 requires detailed knowledge about SARS-  
32 CoV-2 biology. Several techniques to detect SARS-CoV-2 infection have been established, mainly based  
33 on counting infected cells by staining plaques or foci, or by quantifying the viral genome by PCR. These  
34 methods are laborious, time-consuming and expensive and therefore not suitable for a high sample  
35 throughput or rapid diagnostics. We here report a novel enzyme-based immunodetection assay that directly  
36 quantifies the amount of *de novo* synthesized viral spike protein within fixed and permeabilized cells. This  
37 in-cell ELISA enables a rapid and quantitative detection of SARS-CoV-2 infection in microtiter format,  
38 regardless of the virus isolate or target cell culture. It follows the established method of performing ELISA  
39 assays and does not require expensive instrumentation. Utilization of the in-cell ELISA allows to e.g.  
40 determine TCID<sub>50</sub> of virus stocks, antiviral efficiencies (IC<sub>50</sub> values) of drugs or neutralizing activity of sera.  
41 Thus, the in-cell spike ELISA represents a promising alternative to study SARS-CoV-2 infection and  
42 inhibition and may facilitate future research.

45 **Introduction:**

46 The severe acute respiratory syndrome coronavirus 2 (SARS-CoV-2) emerged as a novel human pathogen  
47 at the end of 2019 and spread around the globe within three months. It causes the coronavirus disease 2019  
48 (COVID-19) that if symptomatic manifests as fever, cough, and shortness of breath, and can progress to  
49 pneumonia, acute respiratory distress syndrome resulting in septic shock, multi-organ failure and death. As  
50 of end of May 2020, more than 376,000 deaths worldwide occurred upon SARS-CoV-2 infection which  
51 forced governments to implement strict measures of social distancing to limit the spread of the virus but  
52 greatly impacted individual freedom and economy. Due to its high transmissibility, without such harsh  
53 interventions its pandemic spread is unlikely to be stopped without the cost of a substantial death toll.  
54 Therefore, the development of prophylactics or therapeutics against SARS-CoV-2 is imperative.

55 SARS-CoV-2 is a positive-sense single-stranded RNA virus with diameters of 60-140 nanometers (Zhu et  
56 al., 2020). Like other coronaviruses, SARS-CoV-2 has four structural proteins, the S (spike), E (envelope),  
57 M (membrane), and N (nucleocapsid) proteins. The S protein is responsible for allowing the virus to attach  
58 to and fuse with the membrane of a host cell. It is primed by the transmembrane serine protease 2  
59 (TMPRSS2) resulting in interactions of the S1 subunit with the angiotensin converting enzyme 2 (ACE2)  
60 and rearrangements in S2 to form a six-helix bundle structure that triggers fusion of the viral with the cellular  
61 membrane (Hoffmann et al., 2020; Q. Wang et al., 2020; Xia et al., 2020a, 2020b). Compounds interfering  
62 with the binding of the S protein to ACE2 (Ou et al., 2020; C. Wang et al., 2020) or inhibiting TMPRSS2  
63 or formation of the six-helix bundle also suppress infection by SARS-CoV-2 (Hoffmann et al., 2020; Xia et  
64 al., 2020a, 2020b). SARS-CoV-2 is now intensely investigated to understand viral biology and pathogenesis  
65 and to develop antiviral drugs and vaccines. Techniques to study and quantify SARS-CoV-2 infection and  
66 replication in cell culture have quickly evolved in the past months, partially inspired by methods developed  
67 for the related SARS-CoV or other (corona-) viruses.

68 SARS-CoV-2 infection is mainly quantified by determining the number of infectious particles by counting  
69 virus-induced plaques or foci after staining with crystal violet, neutral red (Keil et al., 2020; Ma et al., 2020;  
70 Runfeng et al., 2020; Xia et al., 2020a) or specific antibodies for SARS-CoV-2 antigens, e.g. against the N  
71 protein (Chu et al., 2020; X. Liu et al., 2020). These antibodies are either labelled directly with horseradish  
72 peroxidase (HRP) or fluorophores, or are detected by a corresponding secondary labelled antibody. The  
73 number of infected cells is then detected by immunofluorescence microscopy, flow cytometry, or by manual  
74 counting by microscope or with the help of computational algorithms (J. Liu et al., 2020; Ma et al., 2020;  
75 Ou et al., 2020; Runfeng et al., 2020). Other methods to quantify infection rates are detection of cell-  
76 associated RNA by RT-qPCR (Monteil et al., 2020; Runfeng et al., 2020) or viral proteins by western  
77 blotting (Ou et al., 2020), which are expensive and unsuitable for large sample numbers. Alternatively, with  
78 prolonged waiting times until results are available, viral replication may be measured by determining the  
79 RNA or infectious titers of progeny virus released from infected cells by RT-qPCR (Chu et al., 2020; J. Liu  
80 et al., 2020; Yao et al., 2020), or tissue culture infectious dose 50 (TCID<sub>50</sub>) endpoint titrations (Chin et al.,  
81 2020; Manenti et al., 2020) and plaque assays (Keil et al., 2020; Ma et al., 2020; Runfeng et al., 2020; Xia  
82 et al., 2020a), respectively. All these assays are well established and validated but have the downside of  
83 being laborious, time-consuming, lacking specificity, and the difficulty to increase sample sizes to perform  
84 analysis in microtiter format which is substantial in the search for antivirals or in diagnostics. Instead of  
85 counting infected cells or quantifying RNA, we here developed an in-cell ELISA that directly quantifies  
86 SARS-CoV-2 infection by detecting newly synthesized S protein. The assay allows detection of all SARS-  
87 CoV-2 isolates tested and can be easily performed in any format including 96-well plates. It can be used to  
88 measure the TCID<sub>50</sub>, to screen for antivirals, and to determine antiviral potencies of drugs (as inhibitory  
89 concentration 50), neutralizing sera or antibodies in a timely and cost-effective manner, within only two  
90 days.

91 **Materials and Methods:**

92 **Cell culture.** Vero E6 (*Cercopithecus aethiops* derived epithelial kidney) cells were grown in Dulbecco's  
93 modified Eagle's medium (DMEM, Gibco) which was supplemented with 2.5% heat-inactivated fetal calf  
94 serum (FCS), 100 units/ml penicillin, 100 µg/ml streptomycin, 2 mM L-glutamine, 1 mM sodium pyruvate,  
95 and 1x non-essential amino acids. Caco-2 (human epithelial colorectal adenocarcinoma) cells were grown  
96 in the same media but with supplementation of 10% FCS. Calu-3 (human epithelial lung adenocarcinoma)  
97 cells were cultured in Minimum Essential Medium Eagle (MEM, Sigma #M4655) supplemented with 10%  
98 FCS, 100 units/ml penicillin, 100 µg/ml streptomycin, 1 mM sodium pyruvate, and 1x non-essential amino  
99 acids. All cells were grown at 37°C in a 5% CO<sub>2</sub> humidified incubator.

100 **Virus strains and virus propagation.** Viral isolate BetaCoV/France/IDF0372/2020 (#014V-03890) and  
101 BetaCoV/Netherlands/01/NL/2020 (#010V-03903) were obtained through the European Virus Archive  
102 global. Virus was propagated by inoculation of 70% confluent Vero E6 in 75 cm<sup>2</sup> cell culture flasks with  
103 100 µl SARS-CoV-2 isolates in 3.5 ml serum-free medium containing 1 µg/ml trypsin. Cells were incubated  
104 for 2 h at 37°C, before adding 20 ml medium containing 15 mM HEPES. Cells were incubated at 37°C and  
105 supernatant harvested at day 3 post inoculation when a strong cytopathic effect (CPE) was visible.  
106 Supernatants were centrifuged for 5 min at 1,000 × g to remove cellular debris, and then aliquoted and stored  
107 at -80°C as virus stocks. Infectious virus titer was determined as plaque forming units or TCID<sub>50</sub>.

108 **Virus isolation from patient samples.** To isolate SARS-CoV-2 from patient samples, 50,000 Vero E6 cells  
109 were seeded in 24-well plates in 500 µl medium incubated over night at 37°C. The next day, medium was  
110 replaced by 400 µl of 2.5 µg/ml amphotericin B containing medium. Then, 100 µl of throat swabs that were  
111 tested positive for SARS-CoV-2 by qRT-PCR were titrated 5-fold on the cells and incubated for 3 to 5 days.  
112 Upon visible CPE, supernatant was taken and virus expanded by inoculation of Vero E6 cell in 75 cm<sup>2</sup> flasks  
113 and propagated as above described, resulting in the two viral isolates BetaCoV/Germany/Ulm/01/2020 and  
114 BetaCoV/Germany/Ulm/02/2020.

115 **Plaque assay.** To determine plaque forming units (PFU), SARS-CoV-2 stocks were serially diluted 10-fold  
116 and used to inoculate Vero E6 cells. To this end, 800,000 Vero E6 cells were seeded per 12 well in 1 ml  
117 medium and cultured overnight to result in a 100% confluent cell monolayer. Medium was removed, cells  
118 were washed once with PBS and 400 µl PBS were added. Cells were then inoculated with 100 µl of titrated  
119 SARS-CoV-2 and incubated for 1 to 3 h at 37°C with shaking every 15 to 30 min. Next, cells were overlaid  
120 with 1.5 ml of 0.8% Avicel RC-581 (FMC Corporation) in medium and incubated for 3 days. Cells were  
121 fixed by adding 1 ml 8% paraformaldehyde (PFA) and incubation at room temperature for 45 min.  
122 Supernatant was discarded, cells were washed with PBS once, and 0.5 ml of staining solution (0.5% crystal  
123 violet and 0.1% triton in water) was added. After 20 min incubation at room temperature, the staining  
124 solution was washed off with water, virus-induced plaques were counted, and PFU per ml calculated. Based  
125 on the applied PFU per cell the MOIs were calculated.

126 **TCID<sub>50</sub> endpoint titration.** To determine the tissue culture infectious dose 50 (TCID<sub>50</sub>), SARS-CoV-2  
127 stocks were serially diluted 10-fold and used to inoculate Vero E6 or Caco-2 cells. To this end, 6,000 Vero  
128 E6 or 10,000 Caco-2 cells were seeded per well in 96 flat bottom well plates in 100 µl medium and incubated  
129 over night before 62 µl fresh medium was added. Next, 18 µl of titrated SARS-CoV-2 of each dilution was  
130 used for inoculation, resulting in final SARS-CoV-2 dilutions of 1:10<sup>1</sup> to 1:10<sup>9</sup> on the cells in sextuplicates.  
131 Cells were then incubated for 5 days and monitored for CPE. TCID<sub>50</sub>/ml was calculated according to Reed  
132 and Muench.

133 **Establishment of the in-cell SARS-CoV-2 ELISA.** To establish detection of SARS-CoV-2 infection,  
134 6,000 Vero E6 or 10,000 Caco-2 target cells were seeded in 96 well plates in 100 µl. The next day, 62 µl

135 fresh medium was added and the cells were inoculated with 18  $\mu$ l of a 10-fold titration series of SARS-  
136 CoV-2. One to three days later, SARS-CoV-2 S protein staining was assessed using an anti-SARS-CoV-2  
137 S protein antibody. To this end, cells were fixed by adding 180  $\mu$ l 8% PFA and 30 min of room temperature  
138 incubation. Medium was then discarded and the cells permeabilized for 5 min at room temperature by adding  
139 100  $\mu$ l of 0.1% Triton in PBS. Cells were then washed with PBS and stained with 1:1,000, 1:5,000 or  
140 1:10,000 diluted mouse anti-SARS-CoV-2 S protein antibody 1A9 (Biozol GTX-GTX632604) in antibody  
141 buffer (PBS containing 10% (v/v) FCS and 0.3% (v/v) Tween 20) at 37°C. After one hour, the cells were  
142 washed three times with washing buffer (0.3% (v/v) Tween 20 in PBS) before a secondary anti-mouse or  
143 anti-rabbit antibody conjugated with HRP was added (1:10,000, 1:15,000, 1:20,000 or 1:30,000) and  
144 incubated for 1 h at 37°C. Following four times of washing, the 3,3',5,5'-tetramethylbenzidine (TMB)  
145 peroxidase substrate (Medac #52-00-04) was added. After 5 min light-protected incubation at room  
146 temperature, reaction was stopped using 0.5 M H<sub>2</sub>SO<sub>4</sub>. The optical density (OD) was recorded at 450 nm  
147 and baseline corrected for 620 nm using the Asys Expert 96 UV microplate reader (Biochrom).

148 **SARS-CoV-2 infection and inhibition assay.** *This is the final protocol established during this study and*  
149 *applied to analyze SARS-CoV-2 infection and inhibition.* To determine SARS-CoV-2 infection, 12,000 Vero  
150 E6 or 30,000 Caco-2 target cells were seeded in 96 well plates in 100  $\mu$ l. The next day, fresh medium and  
151 the respective compound of interest (chloroquine (Sigma-Aldrich #C6628); lopinavir (Selleck Chemicals  
152 #S1380); EK1 (Core Facility Functional Peptidomics, Ulm); remdesivir (Selleck Chemicals #S8932)) was  
153 added and the cells inoculated with the desired multiplicity of infection (MOI; based on PFU per cell) of  
154 SARS-CoV-2 in a total volume of 180  $\mu$ l. Alternatively, virus was preincubated with the compound (human  
155 (Sigma-Aldrich #L8402) or chicken (Sigma-Aldrich #L4919) lysozyme) and the mix used for inoculation.  
156 Two days later, infection was quantified by detecting SARS-CoV-2 S protein. To this end, cells were fixed  
157 by adding 180  $\mu$ l 8% PFA and 30 min of room temperature incubation. Medium was then discarded and  
158 cells permeabilized for 5 min at room temperature by adding 100  $\mu$ l of 0.1% Triton in PBS. Cells were then  
159 washed with PBS and stained with 1:5,000 diluted mouse anti-SARS-CoV-2 S protein antibody 1A9 (Biozol  
160 GTX-GTX632604) in antibody buffer (PBS containing 10% (v/v) FCS and 0.3% (v/v) Tween 20) at 37°C.  
161 After one hour, the cells were washed three times with washing buffer (0.3% (v/v) Tween 20 in PBS) before  
162 a secondary anti-mouse antibody conjugated with HRP (Thermo Fisher #A16066) was added (1:15,000)  
163 and incubated for 1 h at 37°C. Following four times of washing, the TMB peroxidase substrate (Medac #52-  
164 00-04) was added. After 5 min light-protected incubation at room temperature, reaction was stopped using  
165 0.5 M H<sub>2</sub>SO<sub>4</sub>. The optical density (OD) was recorded at 450 nm and baseline corrected for 620 nm using  
166 the Asys Expert 96 UV microplate reader (Biochrom). Values were corrected for the background signal  
167 derived from uninfected cells and untreated controls were set to 100% infection.

168 **SARS-CoV-2 neutralization assay.** Sera was obtained before the SARS-CoV-2 outbreak or from  
169 convalescent COVID-19 patients (confirmed by symptoms and positive SARS-CoV-2 RT-qPCR from  
170 nasopharyngeal swabs) tested for seroconversion by IgG/IgA ELISA (Euroimmun #EI 2606-9601 G/ #EI  
171 2606-9601 A) according to the manufacturers' instructions and IgG/IgM chemiluminescent immunoassay  
172 (Shenzhen New Industries Biomedical Engineering, #130219015M/ #130219016M) performed fully-  
173 automated in a Maglumi 800. To quantify neutralizing activity of the sera, 30,000 Caco-2 target cells were  
174 seeded in 96 well plates in 100  $\mu$ l and the next day 62  $\mu$ l fresh medium was added. The sera were heat-  
175 inactivated (30 min at 56°C), titrated 2-fold starting with a 5-fold dilution, and mixed 1:1 with SARS-CoV-  
176 2 France/IDF0372/2020. After 90 min incubation at room temperature, the mix was used to infect the cells  
177 with 18  $\mu$ l in triplicates at a MOI of 0.01. Two days later, SARS-CoV-2 S protein expression was quantified  
178 as described above.

179 **TCID<sub>50</sub> determination by in-cell SARS-CoV-2 ELISA.** Vero E6 cells were inoculated as described above  
180 for the TCID<sub>50</sub> endpoint titration. Cells were then incubated and CPE development observed by microscopy.

181 At day 4 cells were then fixed (8% PFA), permeabilized (0.1% Triton), stained (1:5,000 1A9; 1:15,000 anti-  
182 mouse-HRP), visualized (TMB) and detected in a microplate reader as described above. Infected wells were  
183 defined as having a higher signal than the uninfected control plus three times the standard deviation.  
184 TCID<sub>50</sub>/ml was calculated as described.

185 **Cell viability assay.** The effect of investigated compounds on the metabolic activity of the cells was  
186 analyzed using the CellTiter-Glo® Luminescent Cell Viability Assay (Promega #G7571). Metabolic  
187 activity was examined under conditions corresponding to the respective infection assays. The CellTiter-  
188 Glo® assay was performed according to the manufacturer's instructions. Briefly, medium was removed  
189 from the culture after 2 days of incubation and 50% substrate reagent in PBS was added. After 10 min, the  
190 supernatant was transferred into white microtiter plates and luminescence measured in an Orion II  
191 Microplate Luminometer (Titertek Berthold). Untreated controls were set to 100% viability.

192 **Peptide synthesis.** EK1 (Xia et al., 2020b, 2020a) was synthesized automatically on a 0.10 mmol scale  
193 using standard Fmoc solid phase peptide synthesis techniques with the microwave synthesizer (Liberty blue;  
194 CEM). Briefly, Fmoc protecting groups were removed with 20% piperidine in N,N-dimethylformamide  
195 (DMF) and amino acid were added in 0.2 molar equivalent together with a 0.5 molar equivalent of O-  
196 benzotriazole-N,N,N',N'-tetramethyluronium-hexafluoro-phosphate and a 2 molar equivalent of  
197 diisopropylethylamine. The coupling reaction was performed with microwaves in a few minutes followed  
198 by a DMF wash. Once the synthesis was completed, the peptide was cleaved in 95% trifluoroacetic acid,  
199 2.5% triisopropylsilane, and 2.5% H<sub>2</sub>O for one hour. The peptide residue was precipitated and washed with  
200 cold diethyl ether and allowed to dry under vacuum to remove residual ether. The peptide was purified using  
201 reversed phase preparative high-performance liquid chromatography (HPLC; Waters) in an  
202 acetonitrile/water gradient under acidic conditions on a Phenomenex C18 Luna column (5 mm pore size,  
203 100 Å particle size, 250 - 21.2 mm). Following purification, the peptide was lyophilized on a freeze dryer  
204 (Labconco) for storage prior to use. The purified peptide mass was verified by liquid chromatography mass  
205 spectroscopy (LCMS; Waters).

206 **Statistical analysis.** The determination of the inhibitory concentration 50 (IC<sub>50</sub>) or inhibitory titer 50 by  
207 four-parametric nonlinear regression and one-way ANOVA followed by Bonferroni's multiple comparison  
208 test (ns not significant, \* P < 0.01, \*\* P < 0.001, \*\*\* P < 0.0001) were performed using GraphPad Prism  
209 version 8.2.1 for Windows, GraphPad Software, San Diego, California USA, [www.graphpad.com](http://www.graphpad.com).

210

## 211 **Results:**

212 Inspired by the well-established Zika virus infection assay that quantifies the viral envelope (E) protein by  
213 a horseradish peroxidase (HRP) coupled antibody (Aubry et al., 2016; Conzelmann et al., 2019; Müller et  
214 al., 2018, 2017; Röcker et al., 2018) we here aimed to detect the spike (S) protein of SARS-CoV-2 by a  
215 similar approach. To adapt this in-cell ELISA to measure SARS-CoV-2 infection, we made use of the anti-  
216 SARS-CoV/SARS-CoV-2 antibody 1A9 that targets the highly conserved loop region between the HR1 and  
217 HR2 in the S2 subunit of the S protein (Ng et al., 2014; Walls et al., 2020) ([nextstrain.org](http://nextstrain.org) (Hadfield et al.,  
218 2018)). Two SARS-CoV-2 permissive cell lines, Vero E6 (African green monkey epithelial kidney cells)  
219 and Caco-2 (heterogeneous human epithelial colorectal adenocarcinoma cells), were seeded in 96-well  
220 plates and inoculated with increasing multiplicities of infection (MOIs) of a SARS-CoV-2 isolate from  
221 France (BetaCoV/France/IDF0372/2020). After 2, 24, 48 or 72 hours, cells were fixed, permeabilized, and  
222 stained with 1:1,000, 1:5,000, or 1:10,000 dilutions of the anti-SARS-CoV-2 S protein antibody 1A9 for 1  
223 hour. After washing, a 1:20,000 dilution of a secondary HRP-coupled anti-mouse antibody was added, cells  
224 were incubated for 1 hour, washed again before TMB peroxidase substrate was added. After 5 min, reaction

225 was stopped using H<sub>2</sub>SO<sub>4</sub> and optical density (OD) recorded at 450 nm and baseline corrected for 620 nm  
226 using a microplate reader (Biochrom).

227 Already at day 1, we observed a significant increase in ODs upon infection with the highest MOI in Vero  
228 E6 (Fig. 1a) and Caco-2 (Fig. 1b) cells. At day 2, even the lowest MOI of 0.005 resulted in an OD signal  
229 over background in Vero E6 cells, and a maximum OD of  $0.157 \pm 0.004$  after infection with a MOI of 0.05.  
230 Higher MOIs resulted in reduced ODs in both cell lines because of virus-induced cytopathic effect (CPE)  
231 resulting in detached cells, as monitored by light microscopy. S protein present in the viral inoculum did  
232 not result in a significantly increased OD as compared to uninfected controls, as shown in the controls  
233 experiments (day 0) in both cell lines. Thus, using a combination of a S protein-specific antibody and a  
234 secondary detection antibody allows to detect SARS-CoV-2 infected cells by in-cell ELISA, with readily  
235 detectable ODs already 2 days post infection.

236 We next inoculated both cell lines and the SARS-CoV-2 susceptible lung cell line Calu-3 (human epithelial  
237 lung adenocarcinoma cells) with serial 2-fold dilutions of SARS-CoV-2 and performed the in-cell ELISA 2  
238 days later. A viral inoculum dependent increase in the ODs was detected in Vero E6 cells after infection  
239 with a MOI  $\geq 0.05$  (Fig. 1c), in Caco-2 cells already highly significant with a MOI of  $\geq 0.008$  (Fig. 1d) and  
240 in Calu-3 cells at a MOI of 0.014 (Fig. 1e). Thus, under these experimental conditions, Caco-2 and Calu-3  
241 cells allow a more sensitive detection of SARS-CoV-2 infection and replication as Vero E6 cells.

242 To optimize assay sensitivity, i.e. the signal-to-noise (S/N) ratio, we evaluated different secondary antibody  
243 dilutions. For this, Caco-2 cells were inoculated with SARS-CoV-2 (MOIs of 0.0002 to 0.05), fixed at day  
244 2, and stained with the anti-S protein antibody. Thereafter, four different dilutions of the HRP-coupled  
245 secondary antibody were added. OD measurements revealed that highest ODs were obtained with 10,000-  
246 fold diluted secondary antibody (Fig. 1f). However, when calculating the S/N ratios (OD of infected wells  
247 divided by OD of uninfected cells), also the 15,000-fold dilution revealed a similar assay sensitivity with  
248 maximum S/N values of 7.9 as compared to 7.5 for the 1:10,000 dilution (Fig. 1g). Thus, all subsequent  
249 experiments were performed in Caco-2 cells that were seeded at a density of 30,000 cells per well to increase  
250 ODs, and stained with 5,000-fold diluted anti-S and 15,000-fold diluted secondary antibodies.

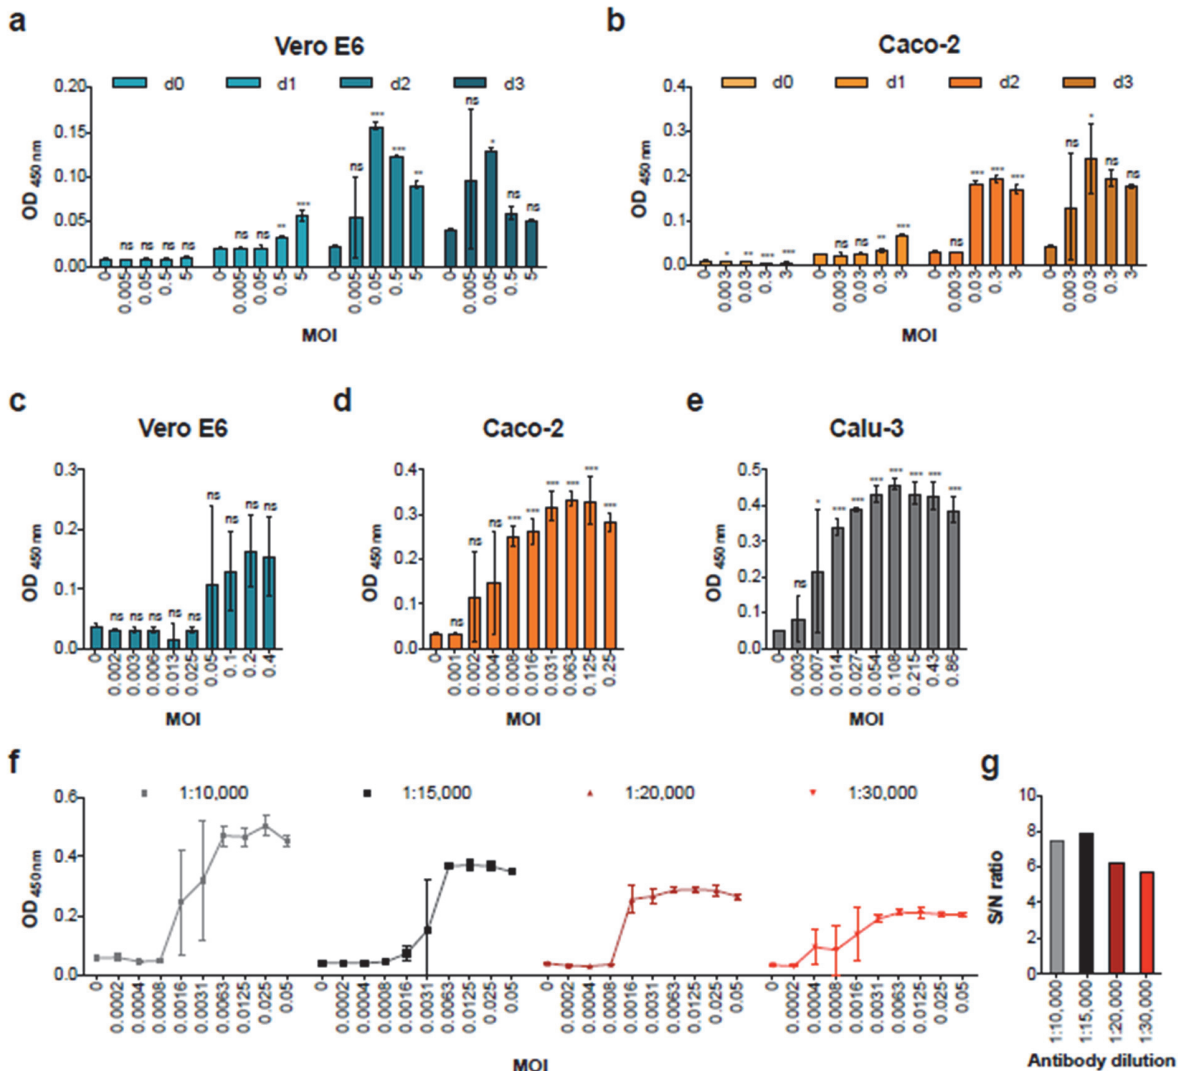

251

252 **Fig. 1. Establishment of an in-cell S protein ELISA to quantify SARS-CoV-2 infection.** a, b) Time course of S  
 253 protein expression in infected Vero E6 and Caco-2 cells as detected by in-cell ELISA. Vero E6 (a) and Caco-2 (b) cells  
 254 were inoculated with increasing MOIs of a SARS-CoV-2 isolate from France. In-cell ELISA (1:5,000 (10 ng/well)  
 255 1A9 antibody; 1:20,000 (2.5 ng/well) HRP-antibody) was performed after 2 hours (d0) or 1, 2 or 3 days post infection.  
 256 c, d, e) ELISA signal correlates with viral input dose. Vero E6 (c), Caco-2 (d), or Calu-3 (e) cells were inoculated with  
 257 serial two-fold dilutions of SARS-CoV-2 and infections rates were determined 2 days later by in-cell ELISA. f)  
 258 Titration of secondary antibody to optimize assay sensitivity applying 5 (1:10,000), 3.3 (1:15,000), 2.5 (1:20,000) or  
 259 1.7 ng/well (1:30,000). Caco-2 cells infected with indicated MOIs of SARS-CoV-2 and stained 2 days later with anti-  
 260 S protein antibody were treated with four dilutions of the HRP-coupled secondary antibody before OD was determined.  
 261 g) Corresponding maximum signal-to-noise (S/N) ratios observed in Fig. 1f. All values show in panels a-e are means  
 262 of raw data obtained from technical triplicates  $\pm$  sd. ns not significant, \*  $P < 0.01$ , \*\*  $P < 0.001$ , \*\*\*  $P < 0.0001$  (by  
 263 one-way ANOVA with Bonferroni's post-test).

264 Having demonstrated that the in-cell ELISA quantifies infection by a French SARS-CoV-2 isolate, we  
 265 wanted to validate that isolates from other geographic areas are also detected. The French isolate clusters  
 266 with the reference Wuhan-Hu-1/2019 isolate whereas the Netherlands/01 strain can be grouped to clade A2a  
 267 (nextstrain.org (Hadfield et al., 2018)). The antibody-targeted S2 domain is generally conserved between  
 268 SARS-CoV-2 strains which should allow detection (Ng et al., 2014; Walls et al., 2020) (nextstrain.org

269 (Hadfield et al., 2018)). To test this, Caco-2 cells were inoculated with increasing MOIs of the  
 270 Netherlands/01 isolate as well as two isolates from Ulm, Southern Germany. Intracellular S protein  
 271 expression was determined 2 days later by in-cell ELISA. As shown in Fig. 2, virus infection was readily  
 272 detectable even upon infection with very low MOIs, suggesting that the ELISA may be applied to all SARS-  
 273 CoV-2 isolates.

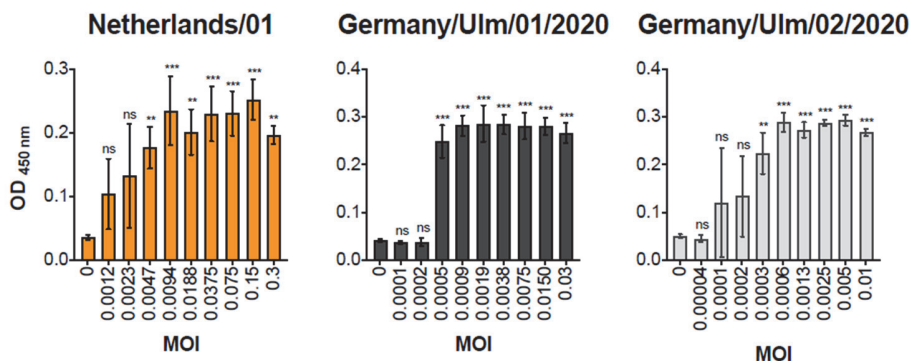

274  
 275 **Fig. 2. The in-cell S protein ELISA detects SARS-CoV-2 isolates from different geographic regions.** Caco-2 cells  
 276 were infected with increasing MOIs of three SARS-CoV-2 isolates and intracellular S protein expression was  
 277 quantified 2 days later by in-cell ELISA. Data shown represent means of raw data obtained from technical triplicates  
 278 ± sd. ns not significant, \*\* P < 0.001, \*\*\* P < 0.0001 (by one-way ANOVA with Bonferroni's post-test).

279 Results shown in Fig. 2 indicate that the assay allows to detect infected wells even after inoculation with  
 280 very low viral MOIs, e.g. a MOI of 0.0003 of the Ulm/01/2020 isolate resulted in a significantly increased  
 281 OD as compared to uninfected controls. We were wondering whether this high sensitivity and ease of  
 282 quantitation may also allow to determine the TCID<sub>50</sub> of virus stocks, that is usually done on Vero E6 cells  
 283 by manually counting infected wells using a microscope. To test this, we titrated virus, inoculated Vero E6  
 284 cells and incubated them for 4 days. We identified infected wells by eye (Fig. 3a), but also performed the  
 285 in-cell ELISA and set a threshold of three times the standard deviation above the uninfected control to  
 286 determine the number of infected wells per virus dilution (Fig. 3b). The subsequent calculation of TCID<sub>50</sub>/ml  
 287 by Reed and Muench revealed exactly the same viral titer for the in-cell ELISA (Fig. 3b) as for microscopic  
 288 evaluation (Fig. 3a) showing that the established ELISA is suitable for determination of viral titers.

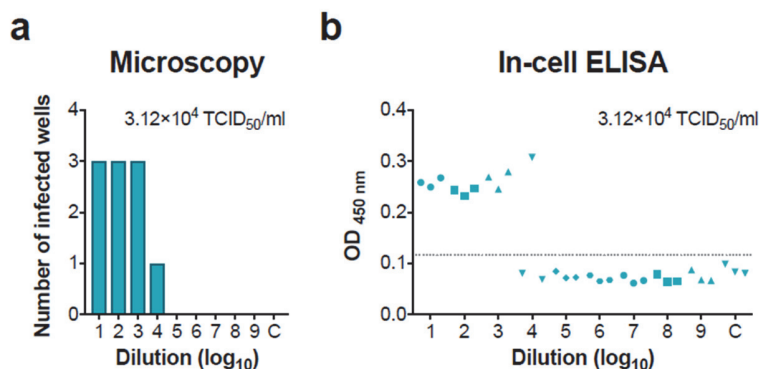

289  
 290 **Fig. 3. Utilization of the in-cell ELISA to determine the TCID<sub>50</sub> of SARS-CoV-2 stocks.** A stock of the French  
 291 SARS-CoV-2 isolate was titrated 10-fold and used to inoculate Vero E6 cells in triplicates. At day 4 post infection, the  
 292 number of infected wells was determined by **a)** microscopically evaluating the CPE or **b)** performing the SARS-CoV-  
 293 2 S protein in-cell ELISA. Grey line illustrates the threshold of 0.117 (three times the sd added to the uninfected



294 control) used to determine infected wells. The corresponding titer determined according to Reed and Muench is shown  
295 as inlet in both figures.

296 We next set out to analyse whether lysozyme, a well-known antimicrobial enzyme that is abundant in body  
297 fluids such as tears (McDermott, 2013), saliva (Petit and Jollès, 1963), human milk (Andreas et al., 2015;  
298 Chanan et al., 1964; Koenig et al., 2005) and mucus (Dajani et al., 2005) may affect SARS-CoV-2 infection.  
299 To this end, the French viral isolate was treated with lysozyme purified from human neutrophils, and then  
300 used to infect Caco-2 cells. Simultaneously, two more SARS-CoV-2 isolates were treated with lysozyme  
301 from chicken egg white and inoculated on Caco-2 cells. In-cell S protein ELISA performed 2 days later  
302 demonstrated that none of the lysozyme preparations inhibited viral infection, suggesting that this innate  
303 immune defence enzyme does not protect against SARS-CoV-2 infection in saliva or mucus of the  
304 respiratory tract.

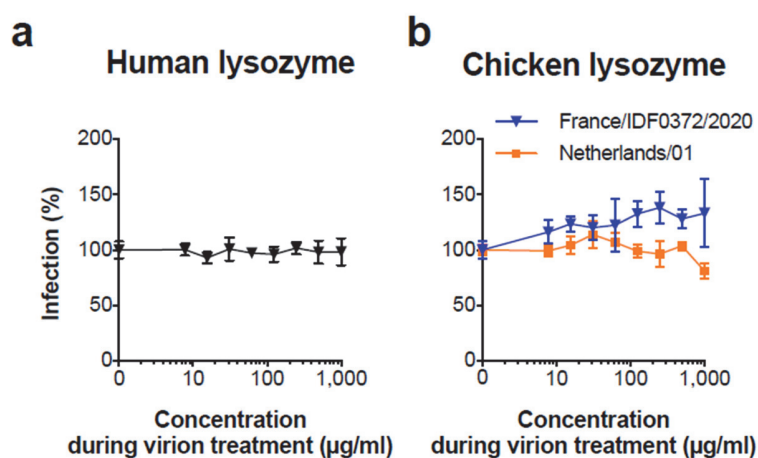

305  
306 **Fig. 4. Effect of lysozyme on SARS-CoV-2 infection.** a) Human lysozyme was incubated with a French SARS-CoV-  
307 2 isolate and b) chicken lysozyme with a French and Dutch isolate for 2 hours at 37°C before these mixtures were used  
308 to infect Caco-2 cells. In-cell ELISA was performed at day 2 post infection. Uninfected controls were subtracted and  
309 data normalized to infection rates in absence of lysozyme. Values represent means of 3 technical replicates ± sd.

310 We then examined whether the ELISA allows to determine the antiviral activity of known SARS-CoV-2  
311 inhibitors. Caco-2 cells were treated with serial dilutions of the small SARS-CoV-2 inhibiting molecules  
312 chloroquine (Jeon et al., 2020; M. Wang et al., 2020), lopinavir (Jeon et al., 2020), remdesivir (Jeon et al.,  
313 2020; M. Wang et al., 2020) and the peptide inhibitor EK1 (Xia et al., 2020b, 2020a), and were then infected  
314 with SARS-CoV-2. In-cell ELISAs performed 2 days later demonstrated a concentration-dependent  
315 antiviral activity of the tested compounds reflecting typical dose-response curves of antiviral agents  
316 (Fig. 5a-d). This also allowed the calculation of the inhibitory concentration 50 (IC<sub>50</sub>) values, i.e. 23.9 µM  
317 for chloroquine (Fig. 5a), 21.0 µM for lopinavir (Fig. 5b), 32.4 nM for remdesivir (Fig. 5c), and 303.5 nM  
318 for EK1 (Fig. 5d). These values are in the same range as previously reported on Vero E6 cells (1.13 - 7.36  
319 µM for chloroquine (Jeon et al., 2020; J. Liu et al., 2020; M. Wang et al., 2020), 9.12 µM for lopinavir (Jeon  
320 et al., 2020), 770 nM for remdesivir (M. Wang et al., 2020), and 2,468 nM for EK1 (Xia et al., 2020a)), and  
321 demonstrate that the in-cell S protein ELISA can be easily adapted to determine antiviral activities of  
322 candidate drugs. Cytotoxicity assays that were performed simultaneously in the absence of virus revealed  
323 no effects on cell viability by antivirally active concentrations of lopinavir, remdesivir and EK1 (Fig. 5b-d).  
324 However, reduced cellular viability rates were observed in the presence of chloroquine concentrations >1  
325 µM (Fig. 5a), which is in line with the fact that part of the anti-SARS-CoV-2 activity of this anti-malaria  
326 drug is attributed to its interference with cell organelle function (J. Liu et al., 2020; Mauthe et al., 2018).

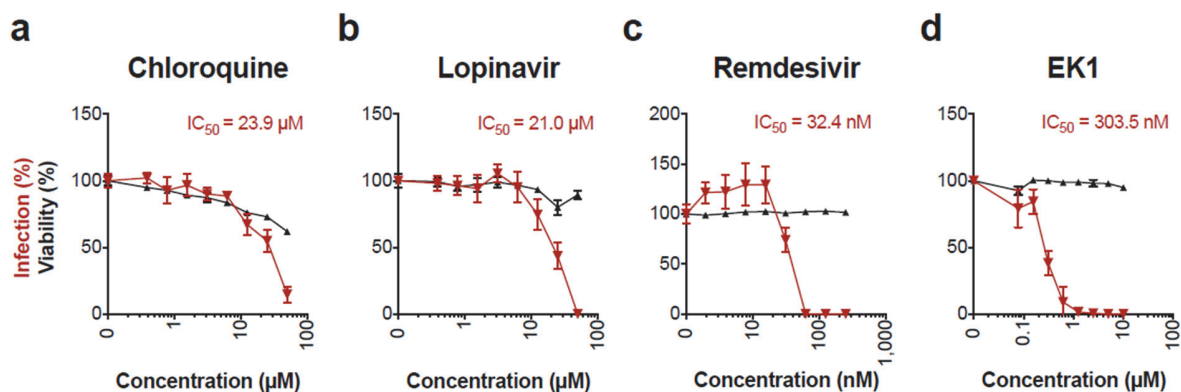

327  
 328 **Fig. 5. Inhibition of SARS-CoV-2 infection by antivirals.** a-d) Caco-2 cell treated with chloroquine (a), lopinavir  
 329 (b), remdesivir (c) or EK1 peptide (d) were infected with SARS-CoV-2 and infection rates were determined 2 days  
 330 later by in-cell S protein ELISA. Uninfected controls were subtracted and values normalized to infection rates in  
 331 absence of compound. Shown are means of 4 biological replicates  $\pm$  sem (chloroquine, lopinavir) or 3 technical  
 332 replicates  $\pm$  sd (remdesivir, EK1). Cell viability of Caco-2 cells treated for 2 days with indicated concentrations of  
 333 drugs was analysed by CellTiter-Glo® Glo assay. Values shown are means of 3 technical replicates  $\pm$  sd. Inhibitory  
 334 concentrations 50 ( $IC_{50}$ ) were calculated by nonlinear regression.

335 Finally, we evaluated whether the assay determines the neutralization activity of serum from SARS-CoV-2  
 336 convalescent individuals. For this, sera that were tested positive or negative for anti-SARS-CoV-2  
 337 immunoglobulins, were serially titrated and incubated with SARS-CoV-2 for 90 minutes at room  
 338 temperature before inoculation of Caco-2 cells. Two days later, we performed the in-cell ELISA as  
 339 described. As shown in Fig. 6, the two control sera, that were obtained before the COVID-19 outbreak or  
 340 shown to contain no SARS-CoV-2 immunoglobulins, did not affect infection. In contrast, both COVID-19  
 341 sera neutralized SARS-CoV-2 infection (Fig. 6). Serum 1 resulted in a more than 50% inhibition at a titer  
 342 of 640 and Serum 2 already neutralized SARS-CoV-2 at the 1,280-fold dilution. This confirms that the in-  
 343 cell ELISA is suitable to detect neutralizing sera. Furthermore, analogous to the  $IC_{50}$ , we calculated the  
 344 “inhibitory titers 50” using nonlinear regression, and determined titers of 654 and 1,076 respectively. These  
 345 titers corresponded well to the presence of immunoglobulins which suggests that the here established  
 346 method can be used to detect and quantify the neutralizing capacities of sera from COVID-19 patients.

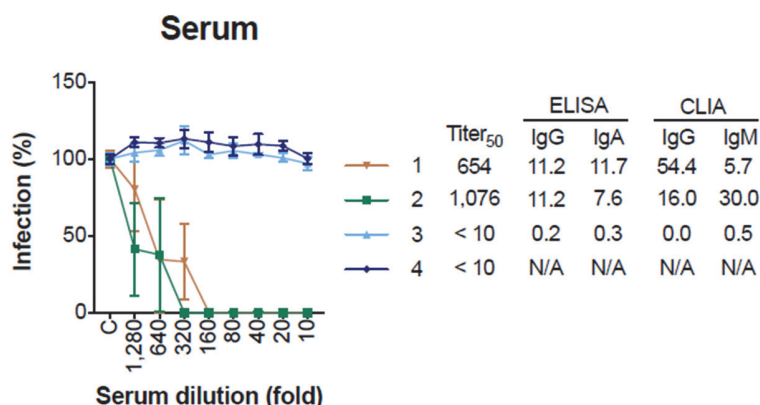

347  
 348 **Fig. 6. Adaption of the in-cell spike ELISA to determine SARS-CoV-2 neutralizing titers of sera.** Sera from  
 349 convalescent COVID-19 patient or control sera were incubated with a French SARS-CoV-2 isolate for 90 minutes at  
 350 room temperature and the mixtures were used to infect Caco-2 cells. In-cell ELISA was performed at day 2 post  
 351 infection. Uninfected controls were subtracted and data normalized to infection rates in absence of serum. Values

352 represent means of 3 technical replicates  $\pm$  sem. Inhibitory titers 50 (Titer<sub>50</sub>) were calculated by nonlinear regression.  
353 SARS-CoV-2-reactive immunoglobulins (Ig) A, M, and G were determined by ELISA or chemiluminescent  
354 immunoassay (CLIA), values represent determined optic densities (OD). Sera are considered positive at ODs  $\geq$  1.1 or  
355  $\geq$  1.0 in ELISA or CLIA, respectively. N/A not available.

356

## 357 **Discussion**

358 We here describe a novel assay that allows quantification SARS-CoV-2 infection by measuring intracellular  
359 levels of the viral S protein in bulk cell cultures. The assay is based on the detection of *de novo* synthesized  
360 S protein by a S2-targeting antibody, and quantification via a corresponding secondary horseradish  
361 peroxidase (HRP)-linked antibody. This more sensitively detects nuances of viral replication than counting  
362 infected cells and is faster than determining titers of progeny virus. At high viral input (e.g. MOI 3), infection  
363 can already be detected after 24 hours, and at low viral input (e.g. MOI 0.005) after 48 hours. The assay has  
364 a linear range and signal-to-noise (S/N) ratios that are suitable to accurately determine the antiviral activity  
365 of drugs (IC<sub>50</sub>s), as shown for entry blocker EK1 (Xia et al., 2020a, 2020b), or intracellularly acting  
366 inhibitors remdesivir and lopinavir (Jeon et al., 2020; M. Wang et al., 2020). Additionally, the assay can be  
367 applied to detect and quantify titers of neutralizing sera of COVID-19 patients, all within only 2 days. This  
368 in-cell ELISA is easy to perform and follows standard ELISA readouts using HRP-mediated TMB substrate  
369 conversion and OD measurements after acidification with no need for expensive equipment.

370 Notably, the assay has been developed to be carried out in microtiter plates and should allow a convenient  
371 medium-to-high throughput testing of antivirals, antibodies, or antisera with timely availability of results,  
372 which is in the fast development of antivirals and in diagnostics. Due to targeting a highly conserved region  
373 and the relatively high sequence homology of global SARS-CoV-2 isolates, it is also applicable to other  
374 isolates as those that were tested herein. Furthermore, conservation in between related viruses suggest that,  
375 also SARS-CoV, and related civet SARS-CoV and bat SARS-like coronavirus infection can be detected  
376 with this assay (Ng et al., 2014; Walls et al., 2020). The in-cell ELISA was established using permissive  
377 Vero E6 and Caco-2 cells and confirmed using Calu-3 cells, but principally all other cell lines or primary  
378 cells supporting productive SARS-CoV-2 infection may also be used. In addition, SARS-CoV-2 is a BSL-  
379 3 pathogen which requires high safety requirements, which are usually at the expense of throughput. One  
380 additional advantage of the in-cell ELISA is that treatment of cells with paraformaldehyde results in the  
381 fixation and inactivation of virions, allowing a downstream processing of the plates outside a BSL-3 facility.

382 Another application of the in-cell S protein ELISA is to reliably determine infectious viral titres in virus  
383 stocks, cell culture supernatants or from patient swabs. Viral titers are usually quantified by limiting dilution  
384 analysis and microscopic determination of infected wells or staining of SARS-CoV-2 induced plaques or  
385 foci with crystal violet, neutral red or specific antibodies for SARS-CoV-2 antigens. We found that the in-  
386 cell ELISA allows to i) discriminate infected from uninfected wells, and ii) even after infection with very  
387 low MOIs (as low as 0.000005, which corresponds to one virion per three wells) at 4 days post infection  
388 (Fig. 3), representing an alternative for non-biased determining the TCID<sub>50</sub> without the need of counting  
389 infected wells or plaques.

390 Conclusively, the S protein specific in-cell ELISA quantifies SARS-CoV-2 infection rates of different cell  
391 lines and allows to rapidly screen for and determine the potency of antiviral compounds. Thus, it represents  
392 a promising, rapid, readily available and easy to implement alternative to the current repertoire of laboratory  
393 techniques studying SARS-CoV-2 and will facilitate future research and drug development on COVID-19.

394

395 **Data sharing**

396 Raw data is available upon request.

397

398 **Acknowledgments:**

399 We thank Daniela Krnavek, Nicola Schrott, Merve Karacan, Carolin Ludwig, Tirza Braun and Vivien Prex  
400 for experimental assistance. This project has received funding from the European Union's Horizon 2020  
401 research and innovation programme under grant agreement No 101003555 (Fight-nCoV) to J.M., the  
402 German Research Foundation (CRC1279) to J.M., S.S. and K.M.J.S., and an individual research grant (to  
403 J.A.M.). J.A.M. is indebted to the Baden-Württemberg Stiftung for the financial support of this research  
404 project by the Eliteprogramme for Postdocs. C.C., R.G., and D.S. are part of and R.G. is funded by a  
405 scholarship from the International Graduate School in Molecular Medicine Ulm. H.S. and B.J. receive  
406 funding from the German Ministry of Health for a clinical trial of convalescent plasma to treat severe  
407 COVID-19.

408

409 **References:**

- 410 Andreas, N.J., Kampmann, B., Mehring Le-Doare, K., 2015. Human breast milk: A review on its  
411 composition and bioactivity. *Early Hum. Dev.* 91, 629–635.  
412 <https://doi.org/10.1016/j.earlhumdev.2015.08.013>
- 413 Aubry, M., Richard, V., Green, J., Broult, J., Musso, D., 2016. Inactivation of Zika virus in plasma with  
414 amotosalen and ultraviolet A illumination. *Transfusion* 56, 33–40. <https://doi.org/10.1111/trf.13271>
- 415 Chanan, R.C., Shahani, K.M., Holly, R.G., 1964. Lysozyme Content of Human Milk. *Nature* 204, 76–77.  
416 <https://doi.org/10.1038/204076a0>
- 417 Chin, A.W.H., Chu, J.T.S., Perera, M.R.A., Hui, K.P.Y., Yen, H., Chan, M.C.W., Peiris, M., Poon,  
418 L.L.M., 2020. Stability of SARS-CoV-2 in different environmental conditions. *The Lancet Microbe*  
419 1, e10. [https://doi.org/10.1016/S2666-5247\(20\)30003-3](https://doi.org/10.1016/S2666-5247(20)30003-3)
- 420 Chu, H., Chan, J.F.-W., Yuen, T.T.-T., Shuai, H., Yuan, S., Wang, Y., Hu, B., Yip, C.C., Tsang, J.O.-L.,  
421 Huang, X., Chai, Y., Yang, D., Hou, Y., Chik, K.K.-H., Zhang, X., Fung, A.Y.-F., Tsoi, H.-W., Cai,  
422 J., Chan, W.-M., Ip, J.D., Chu, A.W., Zhou, J., Lung, D.C., Kok, K., To, K.K., Tsang, O.T., Chan,  
423 K., Yuen, K., 2020. Comparative tropism, replication kinetics, and cell damage profiling of SARS-  
424 CoV-2 and SARS-CoV with implications for clinical manifestations, transmissibility, and laboratory  
425 studies of COVID-19: an observational study. *The Lancet Microbe* 1, e14–e23.  
426 [https://doi.org/10.1016/S2666-5247\(20\)30004-5](https://doi.org/10.1016/S2666-5247(20)30004-5)
- 427 Conzelmann, Zou, Groß, Harms, Röcker, Riedel, Münch, Müller, 2019. Storage-Dependent Generation of  
428 Potent Anti-ZIKV Activity in Human Breast Milk. *Viruses* 11, 591.  
429 <https://doi.org/10.3390/v11070591>
- 430 Dajani, R., Zhang, Y., Taft, P.J., Travis, S.M., Starner, T.D., Olsen, A., Zabner, J., Welsh, M.J.,  
431 Engelhardt, J.F., 2005. Lysozyme Secretion by Submucosal Glands Protects the Airway from  
432 Bacterial Infection. *Am. J. Respir. Cell Mol. Biol.* 32, 548–552. <https://doi.org/10.1165/rcmb.2005-00590C>
- 433
- 434 Hadfield, J., Megill, C., Bell, S.M., Huddleston, J., Potter, B., Callender, C., Sagulenko, P., Bedford, T.,  
435 Neher, R.A., 2018. NextStrain: Real-time tracking of pathogen evolution. *Bioinformatics* 34, 4121–  
436 4123. <https://doi.org/10.1093/bioinformatics/bty407>

- 437 Hoffmann, M., Kleine-Weber, H., Schroeder, S., Krüger, N., Herrler, T., Erichsen, S., Schiergens, T.S.,  
438 Herrler, G., Wu, N.-H., Nitsche, A., Müller, M.A., Drosten, C., Pöhlmann, S., 2020. SARS-CoV-2  
439 Cell Entry Depends on ACE2 and TMPRSS2 and Is Blocked by a Clinically Proven Protease  
440 Inhibitor. *Cell* 181, 271–280.e8. <https://doi.org/10.1016/j.cell.2020.02.052>
- 441 Jeon, S., Ko, M., Lee, J., Choi, I., Byun, S.Y., Park, S., Shum, D., Kim, S., 2020. Identification of antiviral  
442 drug candidates against SARS-CoV-2 from FDA-approved drugs. *Antimicrob. Agents Chemother.*  
443 94. <https://doi.org/10.1128/AAC.00819-20>
- 444 Keil, S.D., Ragan, I., Yonemura, S., Hartson, L., Dart, N.K., Bowen, R., 2020. Inactivation of severe acute  
445 respiratory syndrome coronavirus 2 in plasma and platelet products using a riboflavin and ultraviolet  
446 light-based photochemical treatment. *Vox Sang.* vox.12937. <https://doi.org/10.1111/vox.12937>
- 447 Koenig, Á., Diniz, E.M. de A., Barbosa, S.F.C., Vaz, F.A.C., 2005. Immunologic Factors in Human Milk:  
448 The Effects of Gestational Age and Pasteurization. *J. Hum. Lact.* 21, 439–443.  
449 <https://doi.org/10.1177/0890334405280652>
- 450 Liu, J., Cao, R., Xu, M., Wang, X., Zhang, H., Hu, H., Li, Y., Hu, Z., Zhong, W., Wang, M., 2020.  
451 Hydroxychloroquine, a less toxic derivative of chloroquine, is effective in inhibiting SARS-CoV-2  
452 infection in vitro. *Cell Discov.* 6, 16. <https://doi.org/10.1038/s41421-020-0156-0>
- 453 Liu, X., Li, Z., Liu, S., Sun, J., Chen, Z., Jiang, M., Zhang, Q., Wei, Y., Wang, X., Huang, Y.-Y., Shi, Y.,  
454 Xu, Y., Xian, H., Bai, F., Ou, C., Xiong, B., Lew, A.M., Cui, J., Fang, R., Huang, H., Zhao, J., Hong,  
455 X., Zhang, Y., Zhou, F., Luo, H.-B., 2020. Potential therapeutic effects of dipyridamole in the  
456 severely ill patients with COVID-19. *Acta Pharm. Sin. B* 1–11.  
457 <https://doi.org/10.1016/j.apsb.2020.04.008>
- 458 Ma, Q., Pan, W., Li, R., Liu, B., Li, C., Xie, Y., Wang, Z., Zhao, J., Jiang, H., Huang, J., Shi, Y., Dai, J.,  
459 Zheng, K., Li, X., Yang, Z., 2020. Liu Shen capsule shows antiviral and anti-inflammatory abilities  
460 against novel coronavirus SARS-CoV-2 via suppression of NF- $\kappa$ B signaling pathway. *Pharmacol.*  
461 *Res.* 104850. <https://doi.org/10.1016/j.phrs.2020.104850>
- 462 Manenti, A., Maggetti, M., Casa, E., Martinuzzi, D., Torelli, A., Trombetta, C.M., Marchi, S., Montomoli,  
463 E., 2020. Evaluation of SARS-CoV-2 neutralizing antibodies using a CPE-based colorimetric live  
464 virus micro-neutralization assay in human serum samples. *J. Med. Virol.* jmv.25986.  
465 <https://doi.org/10.1002/jmv.25986>
- 466 Mauthe, M., Orhon, I., Rocchi, C., Zhou, X., Luhr, M., Hijlkema, K.-J., Coppes, R.P., Engedal, N., Mari,  
467 M., Reggiori, F., 2018. Chloroquine inhibits autophagic flux by decreasing autophagosome-  
468 lysosome fusion. *Autophagy* 14, 1435–1455. <https://doi.org/10.1080/15548627.2018.1474314>
- 469 McDermott, A.M., 2013. Antimicrobial compounds in tears. *Exp. Eye Res.* 117, 53–61.  
470 <https://doi.org/10.1016/j.exer.2013.07.014>
- 471 Monteil, V., Kwon, H., Prado, P., Hagelkrüys, A., Wimmer, R.A., Stahl, M., Leopoldi, A., Garreta, E.,  
472 Hurtado del Pozo, C., Prosper, F., Romero, J.P., Wirnsberger, G., Zhang, H., Slutsky, A.S., Conder,  
473 R., Montserrat, N., Mirazimi, A., Penninger, J.M., 2020. Inhibition of SARS-CoV-2 Infections in  
474 Engineered Human Tissues Using Clinical-Grade Soluble Human ACE2. *Cell* 181, 905–913.e7.  
475 <https://doi.org/10.1016/j.cell.2020.04.004>
- 476 Müller, J.A., Harms, M., Krüger, F., Groß, R., Joas, S., Hayn, M., Dietz, A.N., Lippold, S., von Einem, J.,  
477 Schubert, A., Michel, M., Mayer, B., Cortese, M., Jang, K.S., Sandi-Monroy, N., Deniz, M., Ebner,  
478 F., Vapalahti, O., Otto, M., Bartenschlager, R., Herbeuval, J.-P., Schmidt-Chanasit, J., Roan, N.R.,  
479 Münch, J., 2018. Semen inhibits Zika virus infection of cells and tissues from the anogenital region.  
480 *Nat. Commun.* 9, 2207. <https://doi.org/10.1038/s41467-018-04442-y>

- 481 Müller, J.A., Harms, M., Schubert, A., Mayer, B., Jansen, S., Herbeuval, J.-P.J.-P., Michel, D., Mertens,  
482 T., Vapalahti, O., Schmidt-Chanasit, J., Münch, J., 2017. Development of a high-throughput  
483 colorimetric Zika virus infection assay. *Med. Microbiol. Immunol.* 206, 175–185.  
484 <https://doi.org/10.1007/s00430-017-0493-2>
- 485 Ng, O.W., Keng, C.T., Leung, C.S.W., Peiris, J.S.M., Poon, L.L.M., Tan, Y.J., 2014. Substitution at  
486 aspartic acid 1128 in the SARS coronavirus spike glycoprotein mediates escape from a S2 domain-  
487 targeting neutralizing monoclonal antibody. *PLoS One* 9, 1–11.  
488 <https://doi.org/10.1371/journal.pone.0102415>
- 489 Ou, X., Liu, Y., Lei, X., Li, P., Mi, D., Ren, L., Guo, L., Guo, R., Chen, T., Hu, J., Xiang, Z., Mu, Z.,  
490 Chen, X., Chen, J., Hu, K., Jin, Q., Wang, J., Qian, Z., 2020. Characterization of spike glycoprotein  
491 of SARS-CoV-2 on virus entry and its immune cross-reactivity with SARS-CoV. *Nat. Commun.* 11,  
492 1620. <https://doi.org/10.1038/s41467-020-15562-9>
- 493 Petit, J.F., Jollès, P., 1963. Purification and Analysis of Human Saliva Lysozyme. *Nature* 200, 168–169.  
494 <https://doi.org/10.1038/200168a0>
- 495 Röcker, A.E., Müller, J.A., Dietzel, E., Harms, M., Krüger, F., Heid, C., Sowislok, A., Riber, C.F., Kupke,  
496 A., Lippold, S., von Einem, J., Beer, J., Knöll, B., Becker, S., Schmidt-Chanasit, J., Otto, M.,  
497 Vapalahti, O., Zelikin, A.N., Bitan, G., Schrader, T., Münch, J., 2018. The molecular tweezer  
498 CLR01 inhibits Ebola and Zika virus infection. *Antiviral Res.* 152, 26–35.  
499 <https://doi.org/10.1016/j.antiviral.2018.02.003>
- 500 Runfeng, L., Yunlong, H., Jicheng, H., Weiqi, P., Qin Hai, M., Yongxia, S., Chufang, L., Jin, Z., Zhenhua,  
501 J., Haiming, J., Kui, Z., Shuxiang, H., Jun, D., Xiaobo, L., Xiaotao, H., Lin, W., Nanshan, Z., Zifeng,  
502 Y., 2020. Lianhuaqingwen exerts anti-viral and anti-inflammatory activity against novel coronavirus  
503 (SARS-CoV-2). *Pharmacol. Res.* 156, 104761. <https://doi.org/10.1016/j.phrs.2020.104761>
- 504 Walls, A.C., Park, Y.J., Tortorici, M.A., Wall, A., McGuire, A.T., Veesler, D., 2020. Structure, Function,  
505 and Antigenicity of the SARS-CoV-2 Spike Glycoprotein. *Cell* 181, 281–292.e6.  
506 <https://doi.org/10.1016/j.cell.2020.02.058>
- 507 Wang, C., Li, W., Drabek, D., Okba, N.M.A., Haperen, R. Van, Osterhaus, A.D.M.E., Kuppeveld, F.J.M.  
508 Van, Haagmans, B.L., Grosveld, F., Bosch, B., 2020. A human monoclonal antibody blocking  
509 SARS-CoV-2 infection. *Nat. Commun.* 11, 1–6. <https://doi.org/10.1038/s41467-020-16256-y>
- 510 Wang, M., Cao, R., Zhang, L., Yang, X., Liu, J., Xu, M., Shi, Z., Hu, Z., Zhong, W., Xiao, G., 2020.  
511 Remdesivir and chloroquine effectively inhibit the recently emerged novel coronavirus (2019-nCoV)  
512 in vitro. *Cell Res.* 30, 269–271. <https://doi.org/10.1038/s41422-020-0282-0>
- 513 Wang, Q., Zhang, Y., Wu, L., 2020. Structural and Functional Basis of SARS-CoV-2 Entry by Using  
514 Human ACE2. *Cell* 181, 894–904. <https://doi.org/10.1016/j.cell.2020.03.045>
- 515 Xia, S., Liu, M., Wang, C., Xu, W., Lan, Q., Feng, S., Qi, F., Bao, L., Du, L., Liu, S., Qin, C., Sun, F., Shi,  
516 Z., Zhu, Y., Jiang, S., Lu, L., 2020a. Inhibition of SARS-CoV-2 (previously 2019-nCoV) infection  
517 by a highly potent pan-coronavirus fusion inhibitor targeting its spike protein that harbors a high  
518 capacity to mediate membrane fusion. *Cell Res.* 2. <https://doi.org/10.1038/s41422-020-0305-x>
- 519 Xia, S., Zhu, Y., Liu, M., Lan, Q., Xu, W., Wu, Y., Ying, T., Liu, S., Shi, Z., Jiang, S., Lu, L., 2020b.  
520 Fusion mechanism of 2019-nCoV and fusion inhibitors targeting HR1 domain in spike protein. *Cell.*  
521 *Mol. Immunol.* 3–5. <https://doi.org/10.1038/s41423-020-0374-2>
- 522 Yao, X., Ye, F., Zhang, M., Cui, C., Huang, B., Niu, P., Liu, X., Zhao, L., Dong, E., Song, C., Zhan, S.,  
523 Lu, R., Li, H., Tan, W., Liu, D., 2020. In Vitro Antiviral Activity and Projection of Optimized  
524 Dosing Design of Hydroxychloroquine for the Treatment of Severe Acute Respiratory Syndrome

- 525            Coronavirus 2 (SARS-CoV-2). *Clin. Infect. Dis.* 1–8. <https://doi.org/10.1093/cid/ciaa237>
- 526    Zhu, N., Zhang, D., Wang, W., Li, X., Yang, B., Song, J., Zhao, X., Huang, B., Shi, W., Lu, R., Niu, P.,  
527            Zhan, F., Ma, X., Wang, D., Xu, W., Wu, G., Gao, G.F., Tan, W., 2020. A Novel Coronavirus from  
528            Patients with Pneumonia in China, 2019. *N. Engl. J. Med.* 382, 727–733.  
529            <https://doi.org/10.1056/NEJMoa2001017>
- 530

**a**

**Vero E6**

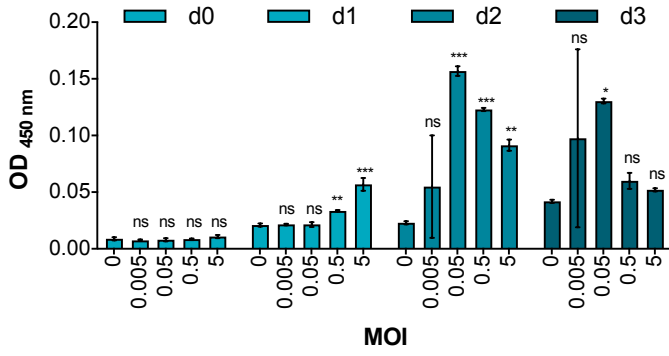

**b**

**Caco-2**

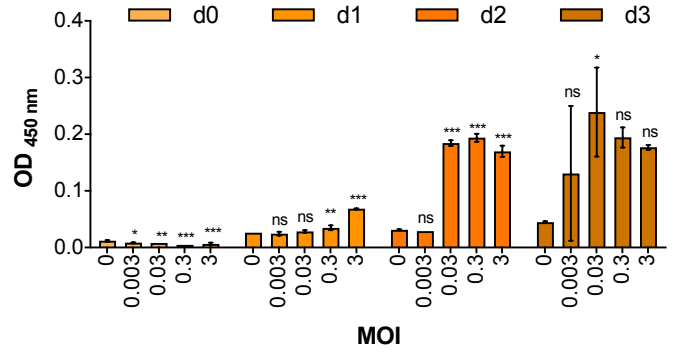

**c**

**Vero E6**

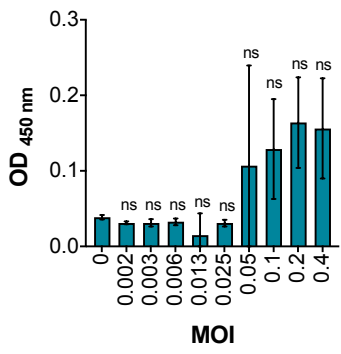

**d**

**Caco-2**

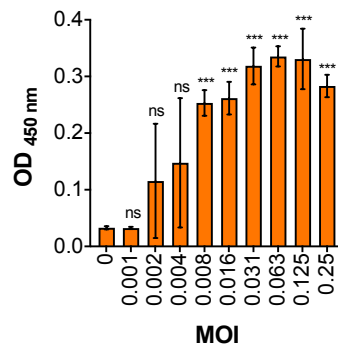

**e**

**Calu-3**

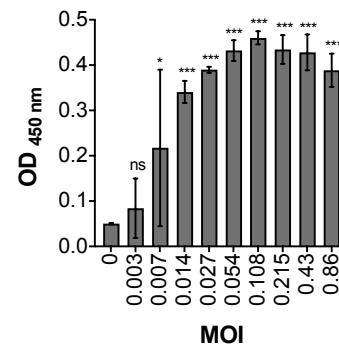

**f**

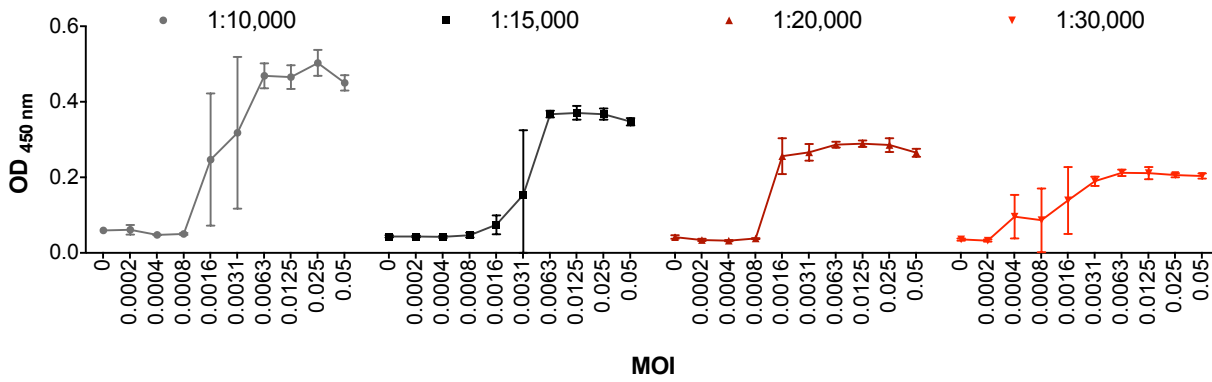

**g**

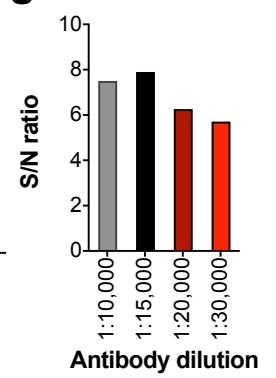



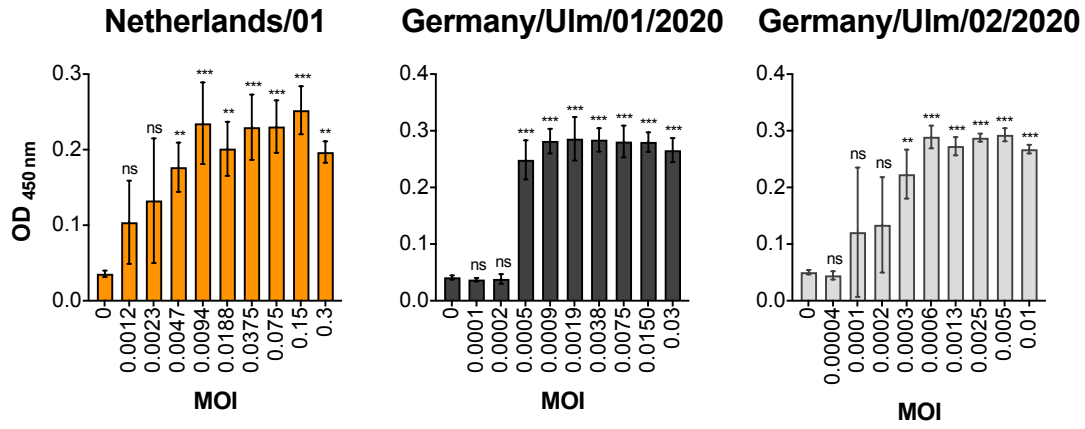

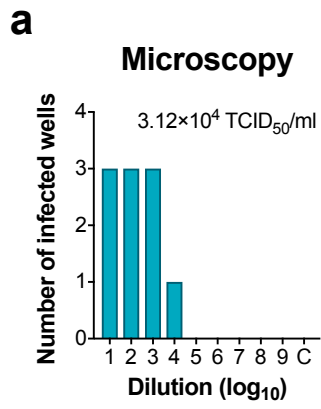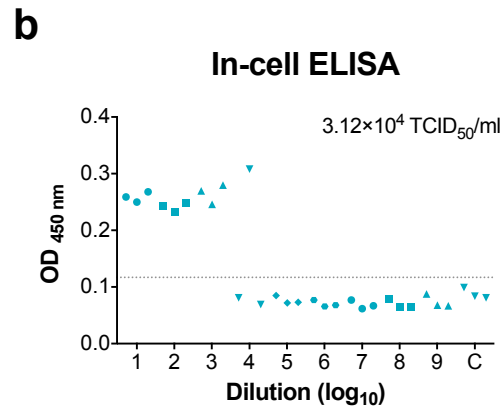

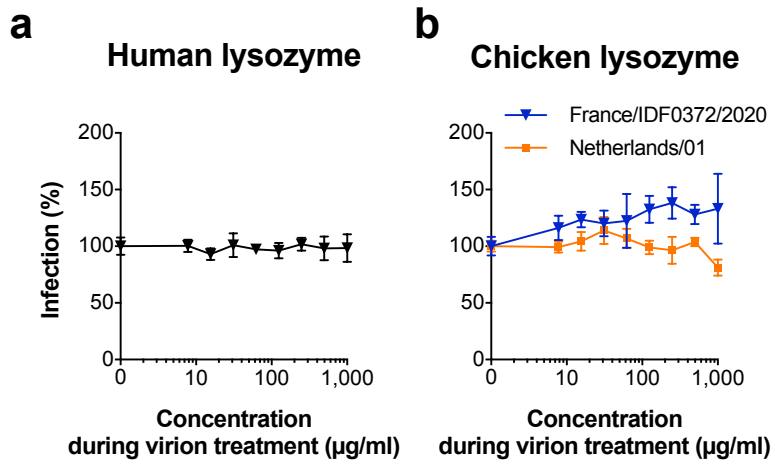

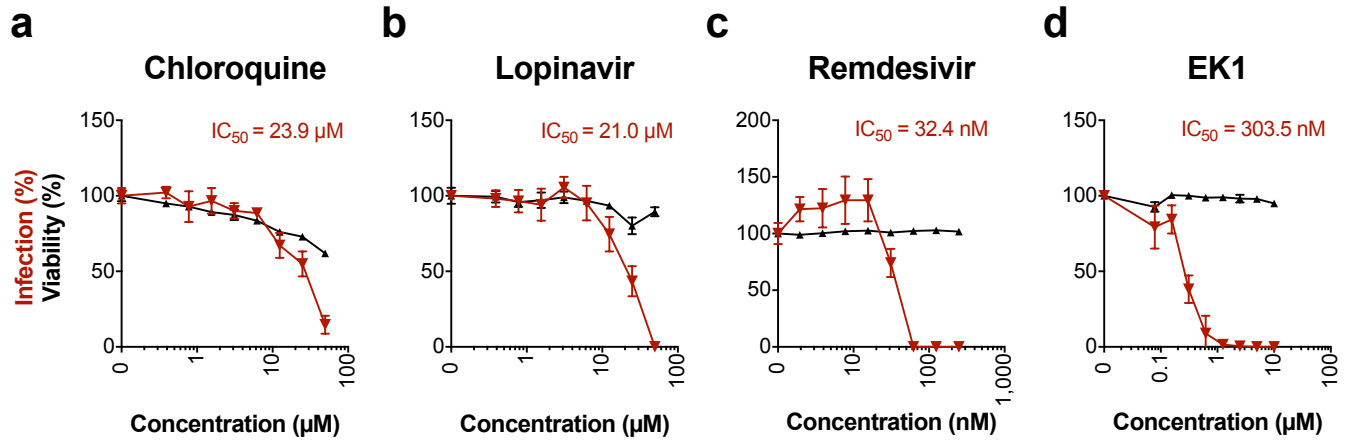

## Serum

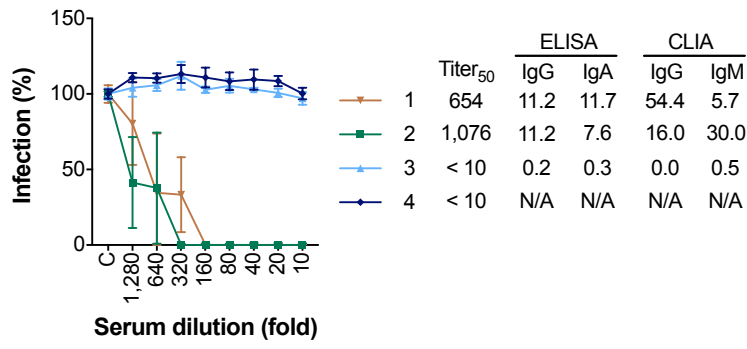

Source: https://biorxiv.org/content/10.1101/2020.06.14.150862v1.full.pdf
